# Supplementary material for: Branched-chain amino acids, especially of leucine and valine, mediate the protein restricted response in a piglet model
Source: Royal Society of Chemistry journal article supplement (doi:10.1039/c9fo01757g), 2020-01-01
Supplement: c9fo01757g1.pdf [file c9fo01757g1.pdf]

1 Supplementary Table 1 Composition and nutrient level for experiment 1.

| Composition%        | 14%CP | 17%CP | 20%CP |
|---------------------|-------|-------|-------|
| Soybean meal        | 6.8   | 14.4  | 22.3  |
| Corn                | 40    | 32.5  | 27.5  |
| Expanded corn       | 32    | 32    | 28    |
| Bean oil            | 0.98  | 0.72  | 1.7   |
| Powder              | 0.56  | 0.55  | 0.50  |
| NaCl                | 0.4   | 0.4   | 0.4   |
| Expanded soybean    | 7     | 7     | 7     |
| Fish meal           | 2     | 3     | 4     |
| Whey powder         | 3     | 3     | 3     |
| Glucose             | 1     | 11    | 1     |
| Sucrose             | 2     | 2     | 2     |
| Citric acid         | 0.8   | 0.8   | 0.8   |
| ZnO                 | 0.3   | 0.3   | 0.3   |
| Choline chloride    | 0.1   | 0.1   | 0.1   |
| Lysine              | 0.91  | 0.6   | 0.3   |
| Methionine          | 0.31  | 0.21  | 0.12  |
| Threonine           | 0.35  | 0.21  | 0.07  |
| Tryptophan          | 0.1   | 0.05  | 0     |
| Vitamine            | 0.05  | 0.05  | 0.05  |
| Composite ore       | 0.15  | 0.15  | 0.15  |
| Fungicide           | 0.06  | 0.06  | 0.06  |
| Antioxidant         | 0.03  | 0.03  | 0.03  |
| Nutritional Level   |       |       |       |
| CP                  | 14.16 | 17.01 | 19.85 |
| Lysine              | 1.32  | 1.31  | 1.32  |
| Methionine+Cysteine | 0.79  | 0.78  | 0.78  |
| Threonine           | 0.83  | 0.83  | 0.83  |
| Tryptophan          | 0.22  | 0.22  | 0.21  |

2

3 Supplementary Table 2 Composition and nutrient level for experiment 2.

| Composition% | 17%CP | 14%CP | BCAAs |
|--------------|-------|-------|-------|
| Soybean meal | 14.50 | 6.84  | 6.84  |
| Corn         | 63.00 | 70.85 | 70.91 |
| Bean oil     | 0.72  | 0.98  | 0.98  |
| Powder       | 0.55  | 0.56  | 0.56  |
| NaCl         | 0.40  | 0.40  | 0.40  |

|                     |       |       |       |
|---------------------|-------|-------|-------|
| Expanded soybean    | 8.00  | 8.00  | 8.00  |
| Fish meal           | 3.30  | 2.20  | 1.50  |
| Whey powder         | 3.20  | 3.00  | 3.00  |
| Glucose             | 1.00  | 1.00  | 1.00  |
| Sucrose             | 2.00  | 2.00  | 2.00  |
| ZnO                 | 0.30  | 0.30  | 0.30  |
| Choline chloride    | 0.10  | 0.10  | 0.10  |
| Lysine              | 0.60  | 0.91  | 0.91  |
| Methionine          | 0.20  | 0.31  | 0.31  |
| Threonine           | 0.21  | 0.35  | 0.35  |
| Tryptophan          | 0.05  | 0.10  | 0.10  |
| CaHPO <sub>3</sub>  | 0.87  | 1.10  | 1.10  |
| Val                 | 0     | 0     | 0.20  |
| Leu                 | 0     | 0     | 0.25  |
| Ile                 | 0     | 0     | 0.18  |
| Premix              | 1.00  | 1.00  | 1.00  |
| Nutritional Level   |       |       |       |
| CP                  | 17.07 | 14.12 | 14.14 |
| Lysine              | 1.34  | 1.34  | 1.31  |
| Methionine+Cysteine | 0.74  | 0.74  | 0.72  |
| Threonine           | 0.84  | 0.84  | 0.82  |
| Tryptophan          | 0.22  | 0.22  | 0.22  |
| Valine              | 0.79  | 0.62  | 0.80  |
| Leu                 | 1.43  | 1.21  | 1.43  |
| Ile                 | 0.69  | 0.53  | 0.69  |

4

5 Supplementary Table 3 Composition and nutrient level for experiment 3.

| Composition%     | 17%CP | 14%CP | Leu   | Ile   | Val   |
|------------------|-------|-------|-------|-------|-------|
| Soybean meal     | 14.50 | 6.84  | 6.84  | 6.84  | 6.84  |
| Corn             | 63.00 | 70.85 | 70.80 | 70.80 | 70.80 |
| Bean oil         | 0.72  | 0.98  | 0.98  | 0.98  | 0.98  |
| Powder           | 0.55  | 0.56  | 0.56  | 0.56  | 0.56  |
| NaCl             | 0.40  | 0.40  | 0.40  | 0.40  | 0.40  |
| Expanded soybean | 8.00  | 8.00  | 8.00  | 8.00  | 8.00  |
| Fish meal        | 3.30  | 2.20  | 2.00  | 2.00  | 2.00  |
| Whey powder      | 3.20  | 3.00  | 3.00  | 3.00  | 3.00  |
| Glucose          | 1.00  | 1.00  | 1.00  | 1.00  | 1.00  |
| Sucrose          | 2.00  | 2.00  | 2.00  | 2.00  | 2.00  |
| ZnO              | 0.30  | 0.30  | 0.30  | 0.30  | 0.30  |
| Choline chloride | 0.10  | 0.10  | 0.10  | 0.10  | 0.10  |

|                     |       |       |       |       |       |
|---------------------|-------|-------|-------|-------|-------|
| Lysine              | 0.60  | 0.91  | 0.91  | 0.91  | 0.91  |
| Methionine          | 0.20  | 0.31  | 0.31  | 0.31  | 0.31  |
| Threonine           | 0.21  | 0.35  | 0.35  | 0.35  | 0.35  |
| Tryptophan          | 0.05  | 0.10  | 0.10  | 0.10  | 0.10  |
| CaHPO3              | 0.87  | 1.10  | 1.10  | 1.10  | 1.10  |
| Val                 | 0     | 0     | 0     | 0     | 0.20  |
| Leu                 | 0     | 0     | 0.25  | 0     | 0     |
| Ile                 | 0     | 0     | 0     | 0.25  | 0     |
| Premix              | 1.00  | 1.00  | 1.00  | 1.00  | 1.00  |
| Nutritional Level   |       |       |       |       |       |
| CP                  | 17.07 | 14.12 | 14.17 | 14.17 | 14.17 |
| Lysine              | 1.34  | 1.34  | 1.33  | 1.33  | 1.33  |
| Methionine+Cysteine | 0.74  | 0.74  | 0.73  | 0.73  | 0.73  |
| Threonine           | 0.84  | 0.84  | 0.83  | 0.83  | 0.83  |
| Tryptophan          | 0.22  | 0.22  | 0.22  | 0.22  | 0.22  |
| Valine              | 0.79  | 0.62  | 0.62  | 0.62  | 0.86  |
| Leu                 | 1.43  | 1.21  | 1.45  | 1.20  | 1.20  |
| Ile                 | 0.69  | 0.53  | 0.52  | 0.77  | 0.52  |

6

7

8
